# Supplementary material for: Biological effects of corticosteroids on pneumococcal pneumonia in Mice—translational significance
Source: PubMed Central journal article supplement (PMC11134653; doi:10.1186/s13054-024-04956-6), 2024-05-29

**Figure S1.**

**A**

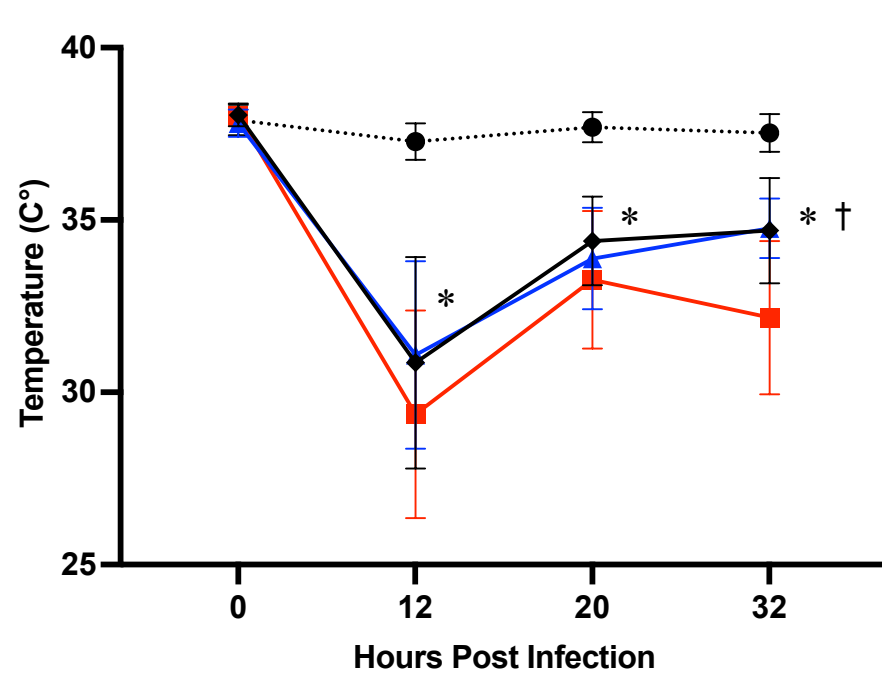

**B**

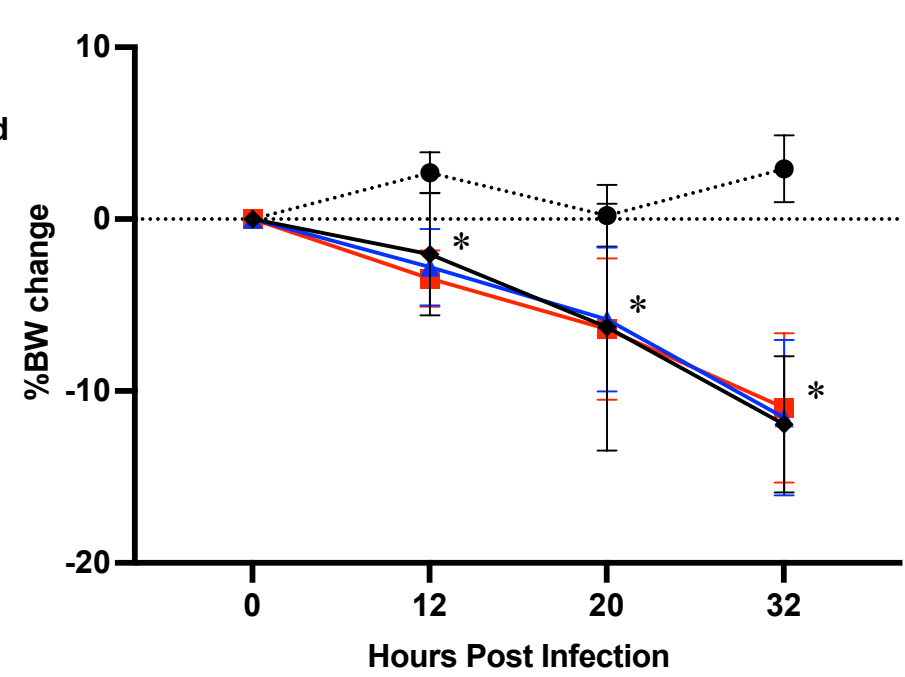

**Figure S2.**

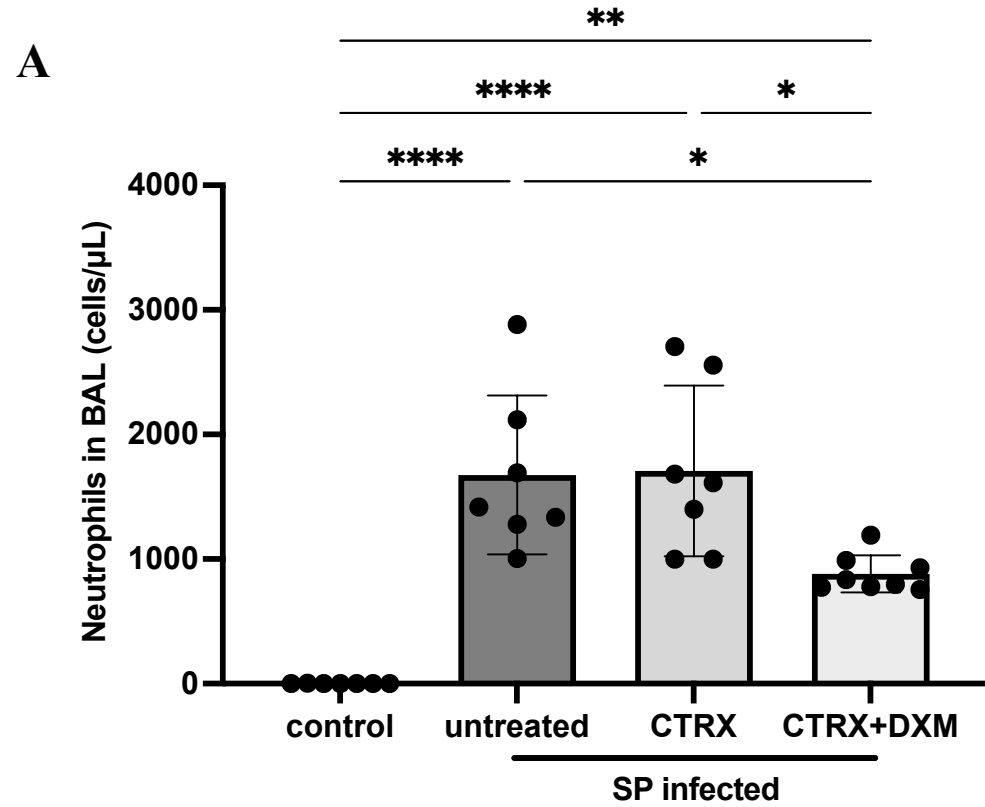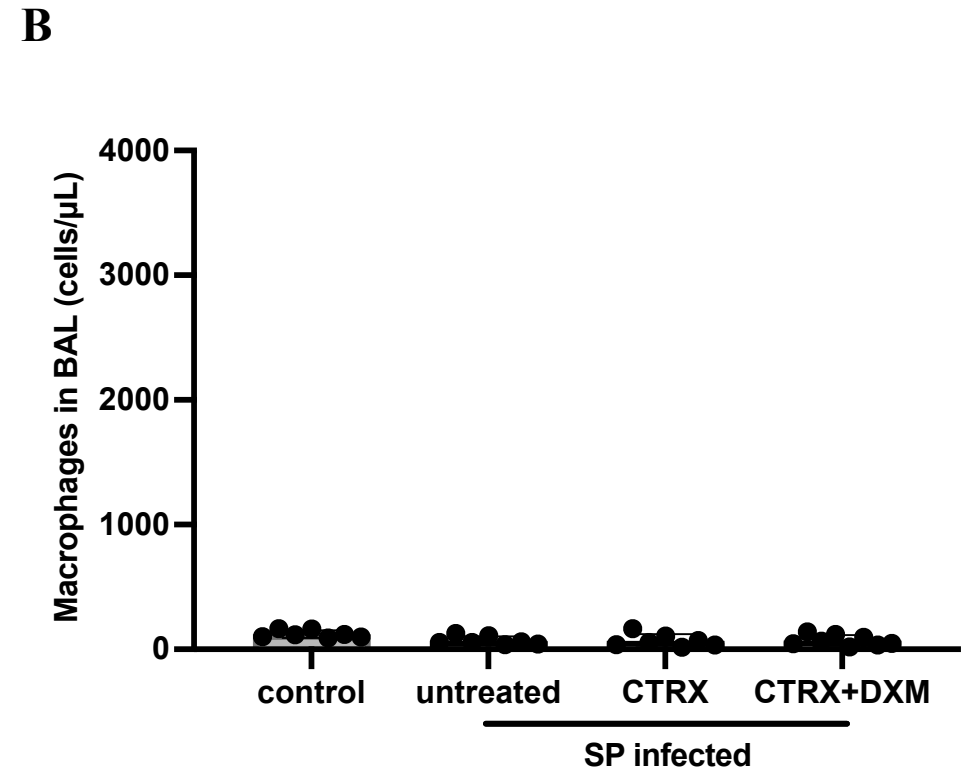

Figure S3.

A

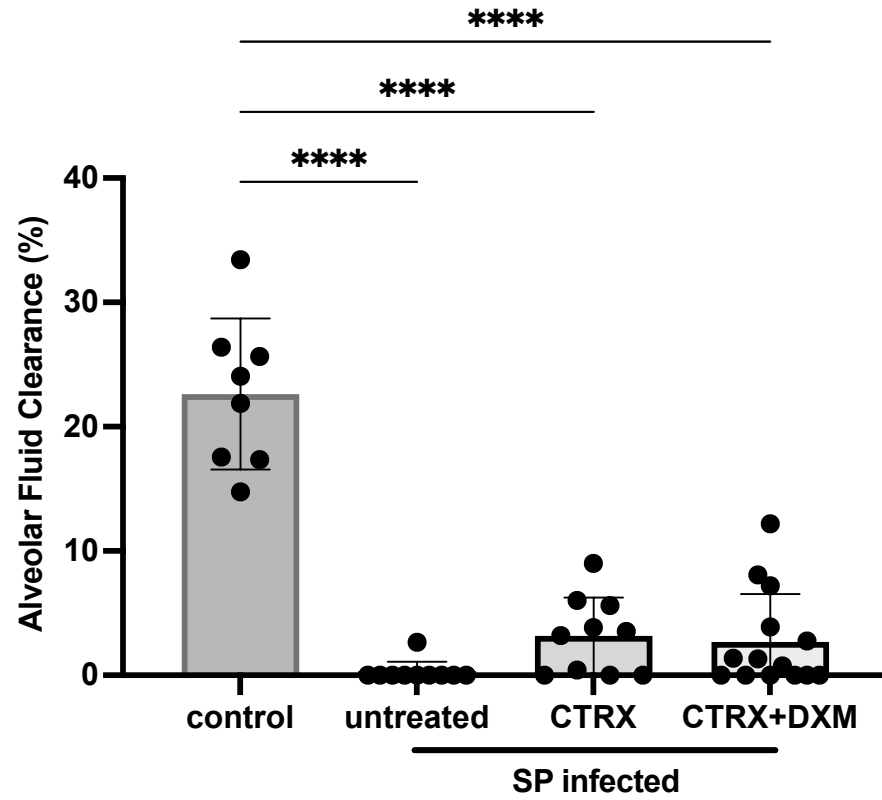

B

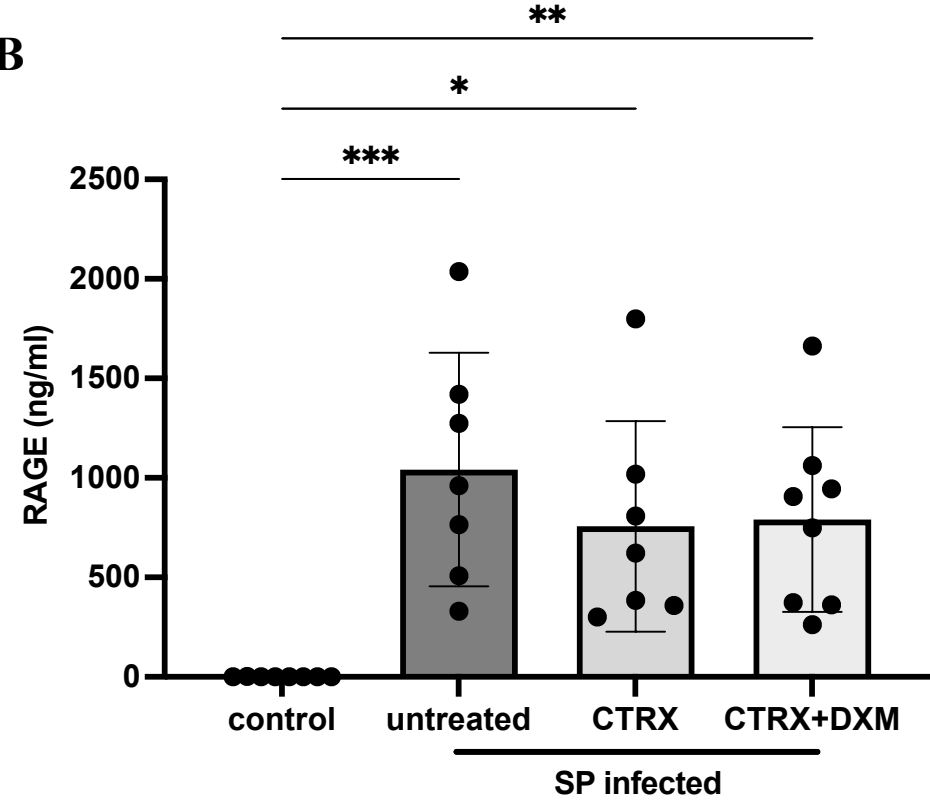

**Figure S4.**

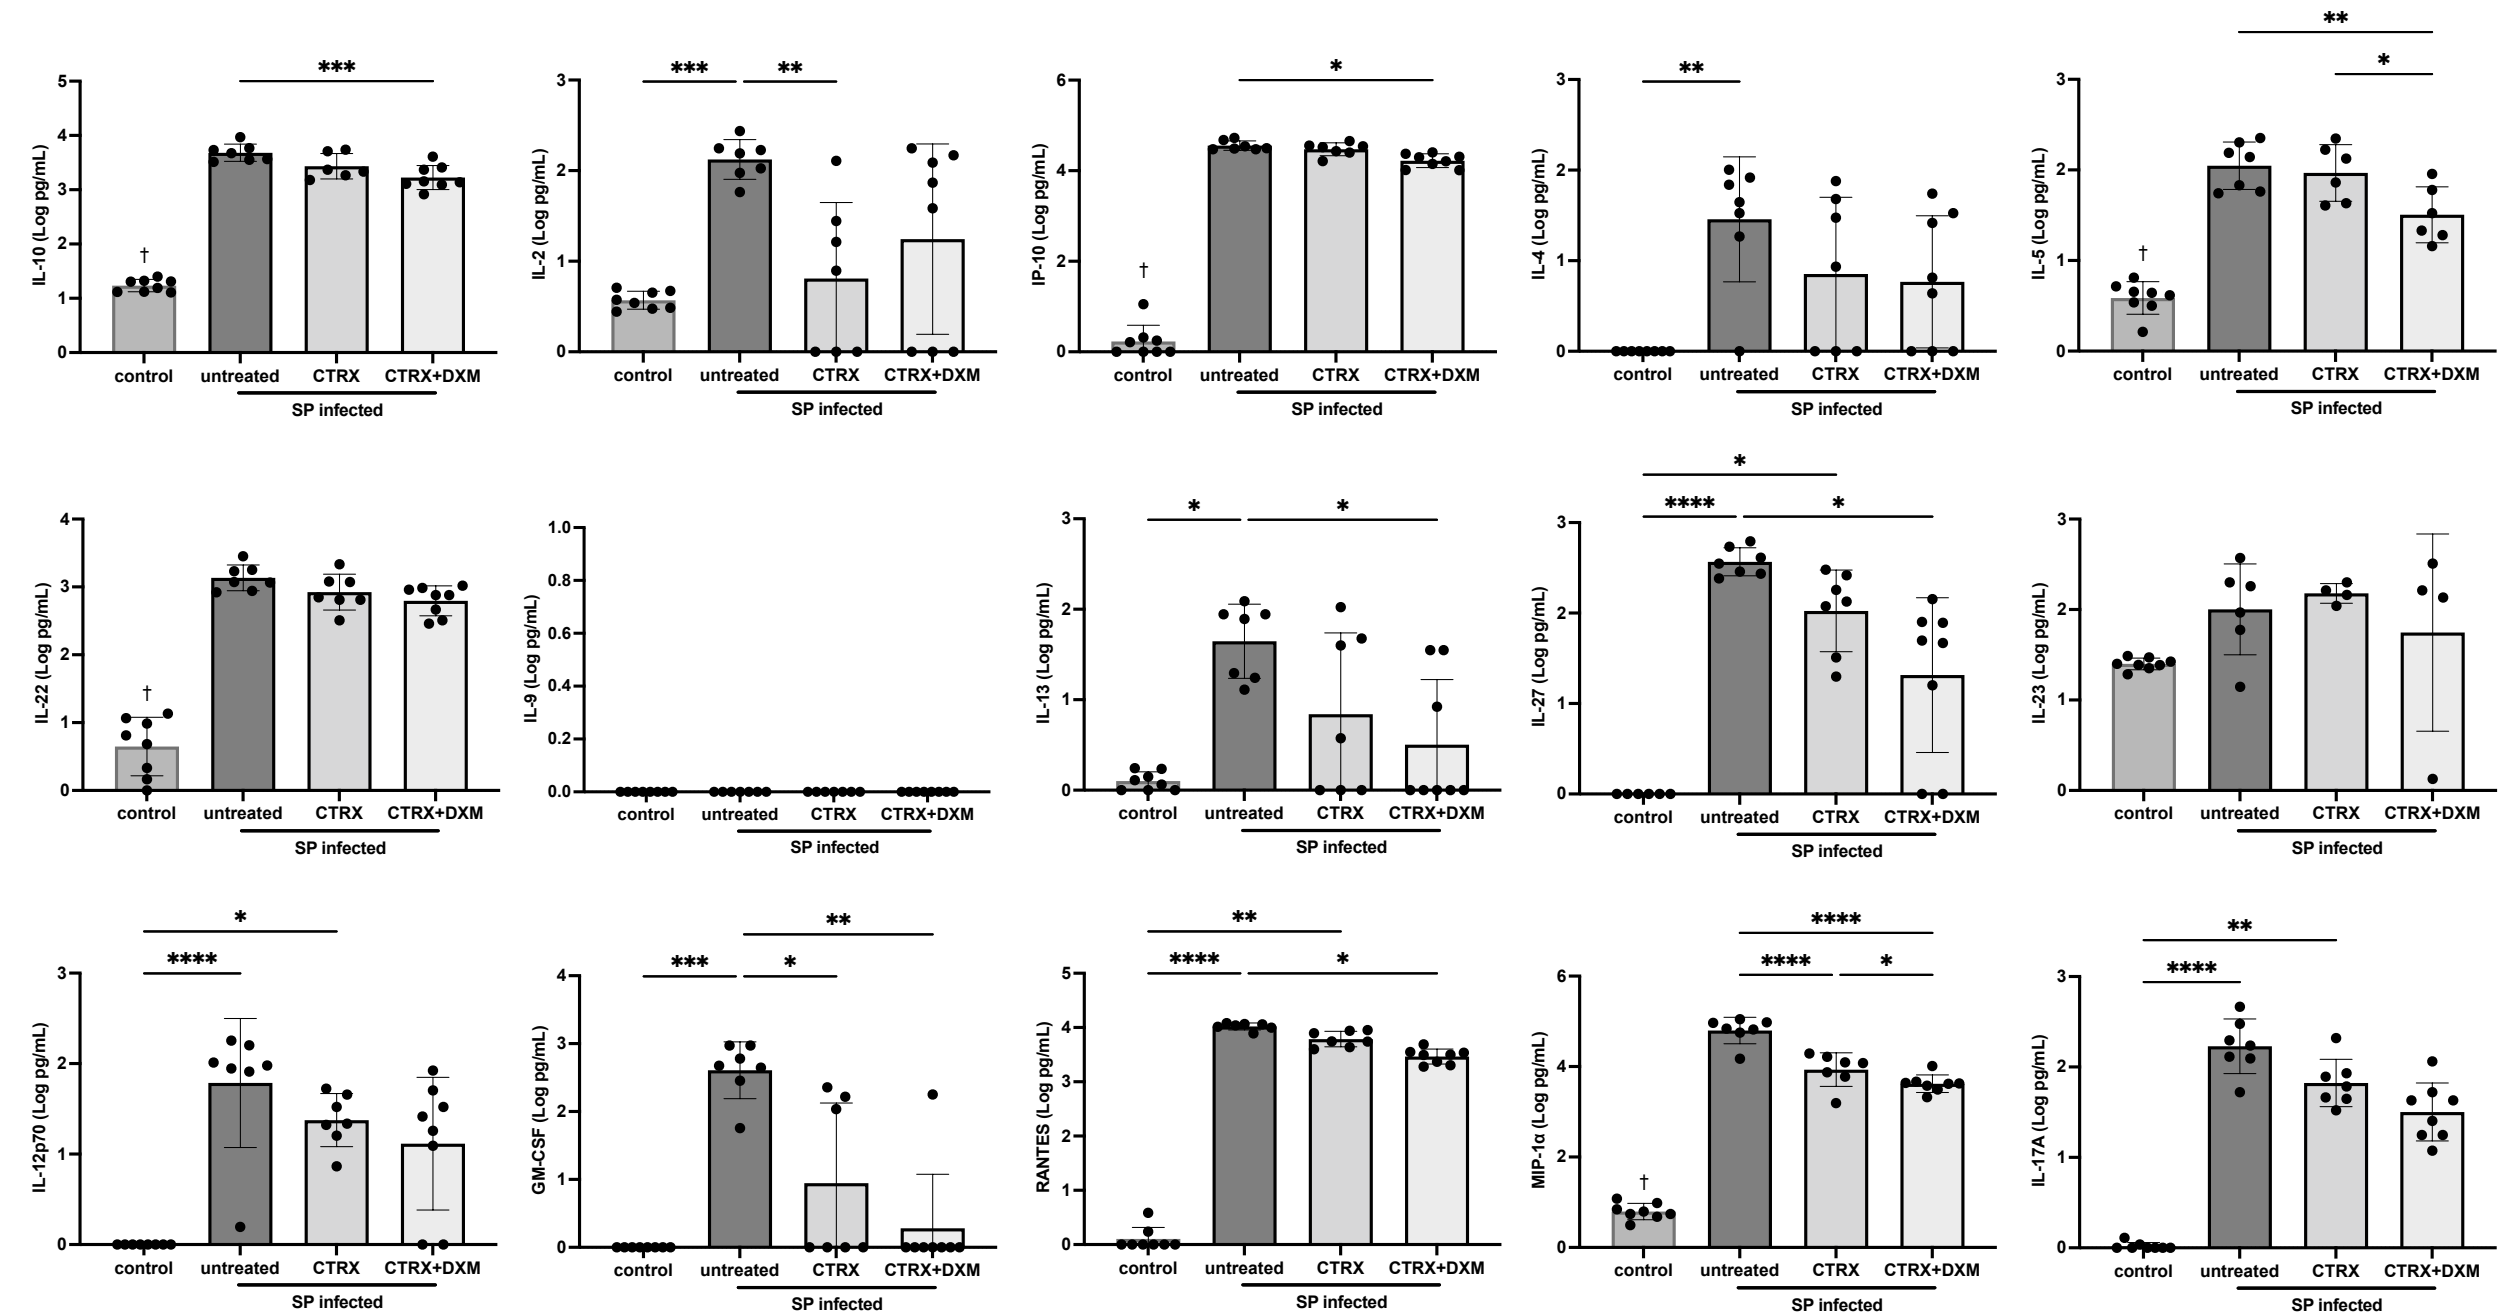

**Figure S4. (continued)**

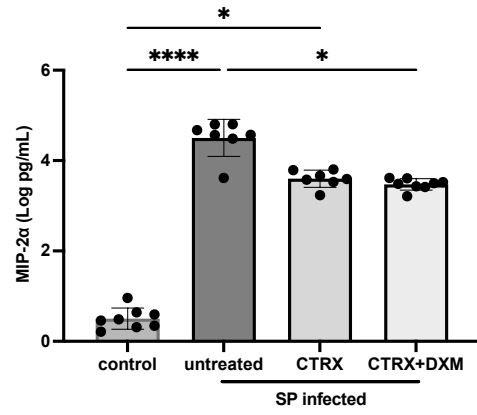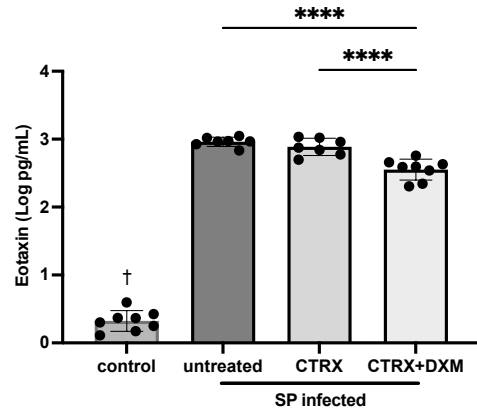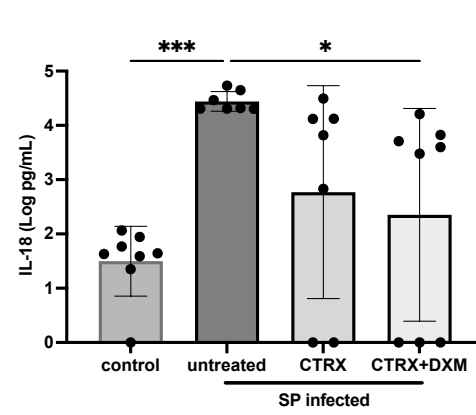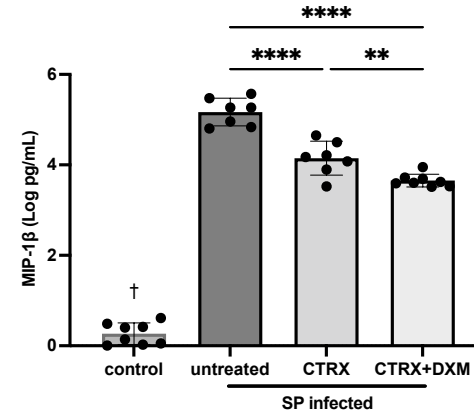

**Figure S5.**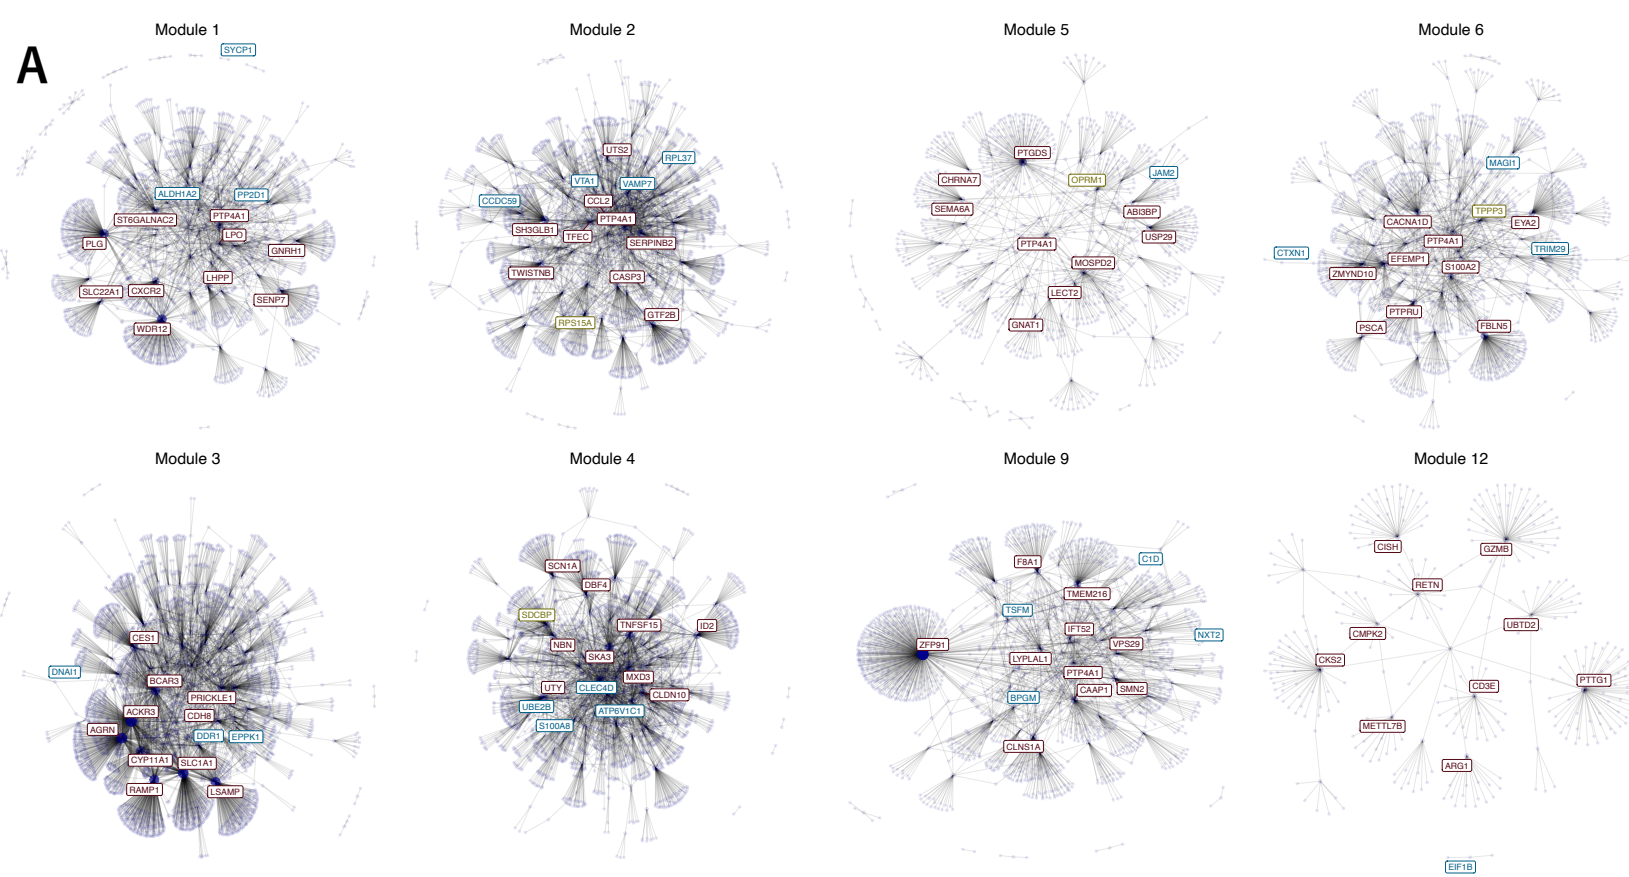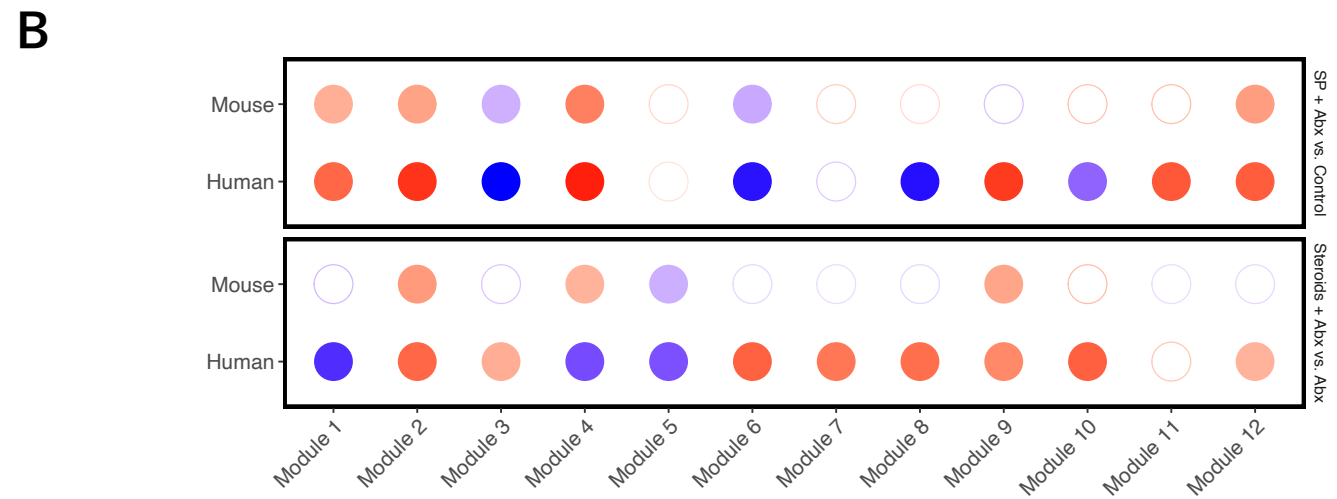

**Figure S6.**

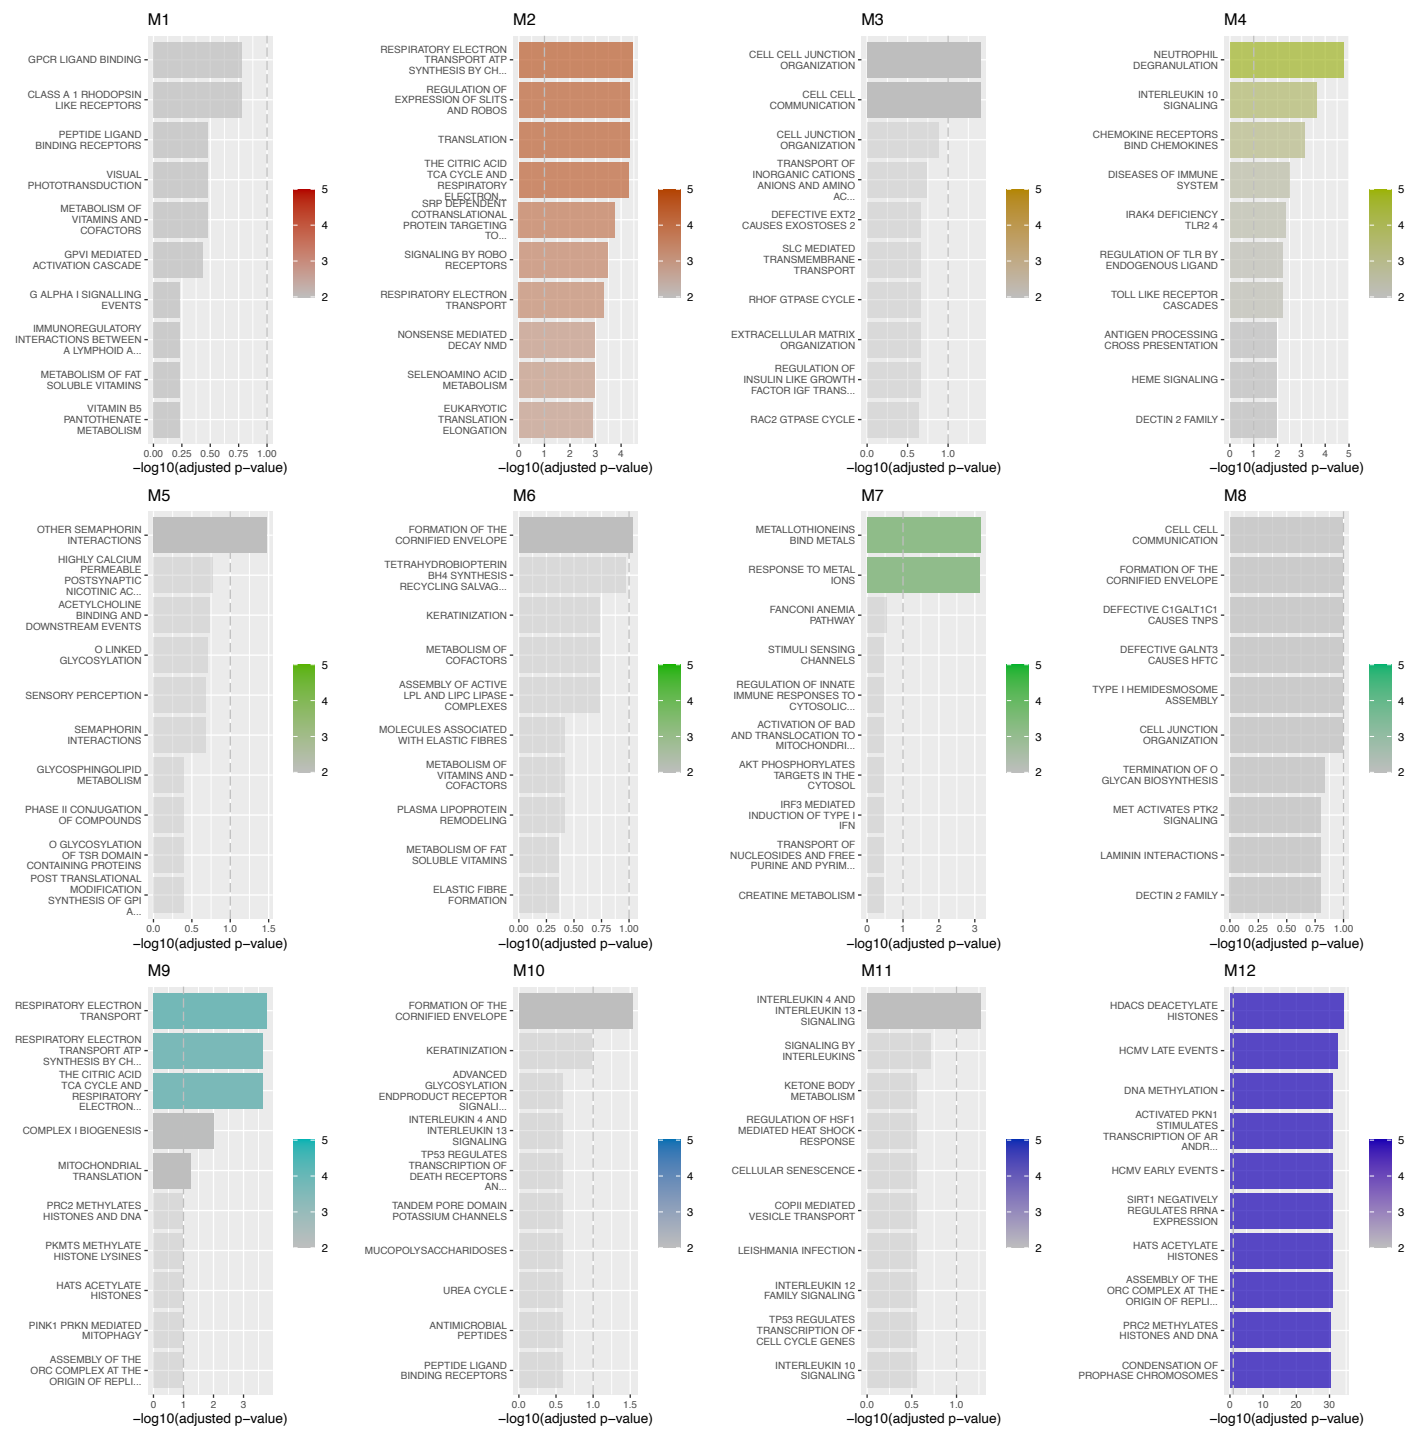

Supplement: 13054_2024_4956_MOESM1_ESM.pdf [file 13054_2024_4956_MOESM1_ESM.pdf]
